# Supplementary material for: Ct threshold values, a proxy for viral load in community SARS-CoV-2 cases, demonstrate wide variation across populations and over time
Source: eLife. 2021 Jul 12;10:e64683. doi: 10.7554/eLife.64683 (PMC8282332; doi:10.7554/eLife.64683)
Supplement: Supplementary file 3. [file elife-64683-supp3.xlsx]

## Sheet: Figure 1
CTPATTERN	evidence_sympt	median	p25	p75	min	max
N only	0	34.0347	33.0994	34.8125	28.2326	38.6547
N only	1	33.7763	32.8349	34.6423	26.0835	38.4237
OR only	0	33.6451	32.6811	34.5351	25.7377	38.2743
OR only	1	33.4304	32.4932	34.3276	16.7782	38.0011
S only	0	34.9391	33.5276	36.165	30.3977	37.2956
S only	1	34.5491	33.1646	35.1227	12.6937	36.8354
OR+N	0	32.0999	30.7634	33.0468	12.7837	37.2234
OR+N	1	31.6473	28.7585	32.7389	10.2784	37.1201
OR+S	0	32.5303	31.349	33.4801	15.1914	36.6177
OR+S	1	32.3532	31.0228	33.4721	15.1011	36.244
N+S	0	33.1354	32.3615	34.1462	28.409	36.846
N+S	1	33.696	32.7778	34.3226	24.9883	35.9726
OR+N+S	0	26.3769	20.703	30.0607	9.3055	36.7774
OR+N+S	1	24.5221	19.2851	28.9376	9.47187	36.1832
OR+N 16nov-	0	29.0561	22.3634	32.0623	10.0822	37.7215
OR+N 16nov-	1	23.9432	18.0826	29.9194	9.22289	37.7795

## Sheet: Figure 2
ct_mean	now_p	now_l	now_u	aro_p	aro_l	aro_u	now_cgh_p	now_cgh_l	now_cgh_u	aro_cgh_p	aro_cgh_l	aro_cgh_u
11	67.2131	58.1301	75.4381	77.8689	69.4579	84.8804	48.3607	39.2209	57.5818	59.8361	50.5762	68.6068
12	56.0784	49.7503	62.2636	66.4093	60.3011	72.1368	42.7451	36.593	49.0678	53.2819	47.005	59.4827
13	57.6792	51.7976	63.4039	74.1497	68.7469	79.0583	43.686	37.9254	49.5756	60.2041	54.3591	65.8412
14	51.2903	45.5757	56.9801	66.3492	60.8371	71.5504	39.6774	34.1919	45.3622	53.3333	47.6562	58.9472
15	54.2538	50.5264	57.9461	70.4167	66.9345	73.7305	40.4463	36.8299	44.1417	54.1667	50.447	57.8521
16	55.1825	51.3698	58.9504	69.6275	66.0665	73.0216	41.8978	38.1718	45.6939	53.2951	49.515	57.0473
17	51.8059	48.4579	55.1418	66.8904	63.6977	69.9712	39.1648	35.9349	42.467	52.5727	49.2397	55.8887
18	52.8926	49.4668	56.2981	67.9113	64.67	71.0289	39.6694	36.3567	43.0543	51.1085	47.7045	54.5049
19	53.602	50.1177	57.0602	69.4915	66.2254	72.6178	42.2466	38.8358	45.7135	54.7215	51.2547	58.1546
20	51.5663	48.1057	55.0157	65.4719	62.141	68.6934	42.1687	38.7818	45.6114	52.8076	49.3611	56.2344
21	53.7608	50.2593	57.2348	65.1219	61.7492	68.3856	42.5401	39.1082	46.0264	50.9756	47.4948	54.4494
22	52.801	49.3586	56.2236	64.9289	61.6025	68.1506	43.1466	39.7648	46.5767	52.4882	49.0562	55.9027
23	52.2113	48.7157	55.6909	65.6479	62.2806	68.902	40.9091	37.5083	44.376	51.2225	47.7368	54.6993
24	51.1543	47.6796	54.6208	62.6794	59.301	65.9681	39.0036	35.655	42.4313	47.8469	44.4136	51.2954
25	49.0291	45.5639	52.5014	62.7098	59.3276	66.0018	39.0777	35.7297	42.5041	48.3213	44.881	51.7736
26	45.0917	41.8546	48.3601	59.3383	56.1145	62.5032	36.7853	33.6733	39.9816	47.5987	44.3594	50.8531
27	44.5005	41.3762	47.6576	57.2428	54.1105	60.3323	34.4097	31.4515	37.4609	43.8561	40.7542	46.9943
28	45.0691	42.0792	48.0858	60.4905	57.5325	63.3922	35.3917	32.5432	38.3197	45.1408	42.1723	48.1353
29	39.7975	37.1072	42.5346	55.8982	53.1467	58.6229	29.9065	27.4117	32.4938	40.2467	37.564	42.9738
30	34.811	32.4255	37.2547	50.3569	47.8295	52.883	25.4237	23.2609	27.6811	35.9507	33.5511	38.4039
31	30.7608	28.6495	32.934	47.1831	44.8848	49.4904	20.4707	18.6418	22.395	31.7985	29.6773	33.9776
32	26.928	25.1319	28.7826	44.3167	42.2947	46.3529	17.4925	15.9671	19.1003	28.6505	26.8284	30.526
33	22.9608	21.4094	24.5694	41.486	39.6571	43.3325	14.337	13.0551	15.6945	25.6665	24.0606	27.3232
34	17.1892	15.7866	18.6631	35.1044	33.3121	36.9287	10.439	9.3127	11.6514	20.7768	19.2683	22.3483
35	14.1226	12.4837	15.8892	32.36	30.1241	34.6576	7.45192	6.23601	8.82033	17.1037	15.331	18.9922
36	13.8225	11.1309	16.8848	30.1695	26.4883	34.0506	6.99659	5.06732	9.37221	15.0847	12.2928	18.2315

## Sheet: Figure 3A
wofy	mean	p10	p25	p50	p75	p90
27apr [w18]	30.6209	21.6909	27.9385	32.0704	34.2687	34.9671
04may [w19]	29.309	21.7249	25.7004	29.6767	32.496	36.3712
11may [w20]	28.3487	19.5861	25.7138	28.175	31.5079	34.9853
18may [w21]	24.9177	16.4634	21.7877	25.1541	29.5435	30.3586
25may [w22]	26.8993	18.9026	21.1205	29.8615	31.8604	32.4091
03jun [w23]	27.116	14.9163	22.6821	28.4165	32.9469	33.9208
09jun [w24]	26.4402	15.8236	22.0263	29.8939	31.3092	32.9914
15jun [w25]	28.5205	18.6774	24.0674	30.8774	33.0077	34.7982
24jun [w26]	30.2274	26.2123	27.074	31.3255	32.6427	32.7846
30jun [w27]	29.5129	12.6937	30.867	32.0749	33.1494	33.8995
07jul [w28]	33.5979	32.4675	33.0627	33.3384	35.0417	35.7331
14jul [w29]	31.8846	18.2867	30.779	34.3848	35.6525	36.7515
20jul [w30]	34.0066	31.2989	33.3064	34.1708	35.3804	35.9722
27jul [w31]	33.6557	31.0864	32.857	33.965	34.8936	35.9241
03aug [w32]	30.8505	19.7653	25.0095	34.0874	35.5256	35.7695
10aug [w33]	27.3223	18.4413	24.088	27.2204	32.7947	34.8815
17aug [w34]	31.474	26.056	28.072	33.1676	34.3538	35.3753
24aug [w35]	28.2631	14.4746	24.6174	31.6809	33.9311	35.0829
31aug [w36]	24.7481	15.7779	18.6144	25.9303	31.5008	33.0696
07sep [w37]	23.614	14.8988	18.5818	23.6586	29.2452	32.6626
14sep [w38]	25.599	17.0655	20.6224	26.612	30.6503	32.7681
21sep [w39]	25.251	16.2308	20.0335	26.559	30.2902	33.0261
28sep [w40]	24.4763	15.4287	19.0032	24.8173	30.3882	32.8724
05oct [w41]	25.3367	16.6469	19.4498	25.5146	31.1504	33.7012
12oct [w42]	26.2438	17.3352	21.2649	27.0803	31.7053	33.5146
19oct [w43]	26.2359	17.2105	20.6405	27.4783	31.7981	33.8203
26oct [w44]	25.7156	16.702	20.4034	26.6129	31.2667	33.4059
02nov [w45]	26.8108	17.2816	21.9387	28.6363	32.0025	33.6162
09nov [w46]	26.769	16.6614	21.0631	28.6954	32.461	34.0633
16nov [w47]	27.8284	18.4575	23.4845	29.6865	32.6958	34.114
23nov [w48]	28.3343	18.2999	24.402	30.4076	33.1592	34.2656
30nov [w49]	28.6554	18.3106	24.2975	31.1974	33.5711	34.6677
07dec [w50]	27.301	16.9166	21.8309	29.5295	33.2774	34.5873
14dec [w51]	24.2068	15.0406	18.0168	24.3632	30.6519	33.2903
21dec [w52]	24.2901	15.2804	18.277	23.9288	30.7733	33.325
28dec [w53]	25.7807	15.5552	19.6249	26.9246	32.1366	34.1205
04jan [w1]	26.0064	16.2051	20.8963	27.5616	31.4244	33.4138
11jan [w2]	28.2649	17.4049	23.7445	30.8817	33.4315	34.5837
18jan [w3]	29.0725	18.4523	25.7301	31.5446	33.6558	34.7866
25jan [w4]	29.4102	18.48	26.5025	32.1242	33.7786	34.876
01feb [w5]	29.5294	19.6269	26.847	31.9675	33.6905	34.6856
08feb [w6]	29.4301	19.0168	26.4333	32.0238	33.784	34.801
15feb [w7]	28.9875	18.7326	25.603	31.6624	33.4394	34.5353
22feb [w8]	28.7732	18.8623	26.1474	30.6919	33.1246	34.5238
01mar [w9]	28.8868	17.8267	25.943	31.3398	33.6197	34.5705
08mar [w10]	28.2885	18.4511	23.9987	30.6605	33.2054	34.4386

## Sheet: Figure 3B
wofy	mean	p10	p25	p50	p75	p90
27apr [w18]	30.6209	21.6909	27.9385	32.0704	34.2687	34.9671
04may [w19]	29.309	21.7249	25.7004	29.6767	32.496	36.3712
11may [w20]	28.3487	19.5861	25.7138	28.175	31.5079	34.9853
18may [w21]	24.9177	16.4634	21.7877	25.1541	29.5435	30.3586
25may [w22]	26.8993	18.9026	21.1205	29.8615	31.8604	32.4091
03jun [w23]	27.116	14.9163	22.6821	28.4165	32.9469	33.9208
09jun [w24]	26.4402	15.8236	22.0263	29.8939	31.3092	32.9914
15jun [w25]	28.5205	18.6774	24.0674	30.8774	33.0077	34.7982
24jun [w26]	30.2274	26.2123	27.074	31.3255	32.6427	32.7846
30jun [w27]	29.5129	12.6937	30.867	32.0749	33.1494	33.8995
07jul [w28]	33.5979	32.4675	33.0627	33.3384	35.0417	35.7331
14jul [w29]	31.8846	18.2867	30.779	34.3848	35.6525	36.7515
20jul [w30]	34.0066	31.2989	33.3064	34.1708	35.3804	35.9722
27jul [w31]	33.5319	30.8436	32.857	33.6102	34.3065	36.1054
03aug [w32]	30.8505	19.7653	25.0095	34.0874	35.5256	35.7695
10aug [w33]	27.3223	18.4413	24.088	27.2204	32.7947	34.8815
17aug [w34]	31.2964	26.056	26.9184	32.9687	34.4832	35.3753
24aug [w35]	27.9664	14.4746	22.5594	31.3282	33.8999	34.3551
31aug [w36]	24.8156	15.5695	19.0843	27.0206	31.2262	33.1082
07sep [w37]	23.907	15.0263	18.66	24.0616	29.2479	32.6626
14sep [w38]	25.4466	16.9173	20.3264	26.673	30.581	32.6973
21sep [w39]	25.2219	15.7109	20.0335	26.5581	30.0781	33.1001
28sep [w40]	24.5382	15.4287	19.0348	24.9248	30.4429	32.9163
05oct [w41]	25.3227	16.5654	19.4169	25.5079	31.1823	33.7158
12oct [w42]	26.2053	17.1836	21.2781	27.0276	31.6923	33.4988
19oct [w43]	26.1599	17.1353	20.5019	27.4652	31.7657	33.8084
26oct [w44]	25.7143	16.702	20.2799	26.6041	31.3526	33.4234
02nov [w45]	26.7217	17.2661	21.7376	28.5275	31.9853	33.5709
09nov [w46]	26.6897	16.7332	21.0217	28.587	32.3507	34.0268
16nov [w47]	27.7129	18.4045	23.3268	29.5482	32.6525	34.1074
23nov [w48]	28.4016	18.4561	24.9349	30.2808	33.0562	34.2523
30nov [w49]	28.7352	18.5595	24.611	31.2539	33.6073	34.7072
07dec [w50]	27.3005	16.9043	21.8453	29.5664	33.2164	34.5482
14dec [w51]	24.0101	14.7992	17.6525	23.8832	30.6519	33.3132
21dec [w52]	24.2141	15.2627	18.213	23.8164	30.6458	33.2779
28dec [w53]	25.6966	15.5798	19.6714	26.7614	32.0248	34.1205
04jan [w1]	25.7513	16.0238	20.4858	27.1368	31.2841	33.3009
11jan [w2]	28.1608	17.283	23.5464	30.7259	33.3509	34.5447
18jan [w3]	28.8219	18.0482	25.4025	31.2147	33.5919	34.7712
25jan [w4]	29.2439	18.2878	26.1033	32.0606	33.7371	34.8334
01feb [w5]	29.4859	19.7868	26.6365	31.9528	33.6909	34.7299
08feb [w6]	29.5092	19.062	26.6843	32.0358	33.7209	34.7884
15feb [w7]	28.8242	18.7182	25.3067	31.5701	33.3906	34.5666
22feb [w8]	28.9314	18.9973	26.388	30.8035	33.2556	34.5238
01mar [w9]	28.3437	16.819	24.4991	30.9556	33.4462	34.5705
08mar [w10]	28.1564	18.9943	23.8434	30.3542	33.1027	34.307

## Sheet: Figure 3C
wofy	now_p	now_l	now_u	aro_p	aro_l	aro_u	now_cgh_p	now_cgh_l	now_cgh_u	aro_cgh_p	aro_cgh_l	aro_cgh_u
27apr [w18]	15.7895	6.02297	31.2534	27.907	15.3289	43.6687	7.89474	1.65865	21.3773	13.9535	5.29766	27.9325
11may [w20]	32.6531	19.9485	47.5401	44.4444	30.9196	58.6	24.4898	13.3429	38.8696	25.9259	14.9577	39.6545
25may [w22]	35.2941	14.2097	61.6716	42.1053	20.2521	66.5002	23.5294	6.81077	49.8993	26.3158	9.14658	51.2029
09jun [w24]	38.0952	18.1072	61.5646	40.9091	20.7093	63.6453	14.2857	3.0489	36.3424	22.7273	7.82063	45.3704
24jun [w26]	0	0	24.7053	30.7692	9.09204	61.4262	0	0	24.7053	0	0	24.7053
07jul [w28]	5.55556	0.140556	27.2944	21.0526	6.05245	45.5653	5.55556	0.140556	27.2944	10.5263	1.30122	33.1377
20jul [w30]	3.44828	0.0872647	17.7644	17.2414	5.84561	35.7748	0	0	11.9445	3.44828	0.0872647	17.7644
03aug [w32]	26.9231	11.5732	47.7875	55.5556	35.3264	74.5201	15.3846	4.35635	34.8679	22.2222	8.62169	42.2583
17aug [w34]	27.907	15.3289	43.6687	51.1111	35.774	66.2966	18.6047	8.39124	33.4014	26.6667	14.6041	41.9447
31aug [w36]	20.5128	9.29639	36.4644	37.5	22.7263	54.1985	12.8205	4.29683	27.4299	20	9.05224	35.6478
07sep [w37]	28.5714	19.2396	39.4681	54.5455	43.5761	65.2002	14.2857	7.60537	23.6249	35.2273	25.339	46.1408
14sep [w38]	37.7622	29.7975	46.2451	60.8108	52.456	68.7237	26.5734	19.5413	34.6026	42.5676	34.4862	50.9526
21sep [w39]	38.326	31.9711	44.9901	51.4644	44.9351	57.957	26.4317	20.8171	32.6732	33.4728	27.5196	39.8419
28sep [w40]	30.5051	26.4748	34.77	57.6628	53.295	61.9434	20	16.5633	23.7996	39.272	35.0579	43.6083
05oct [w41]	35.1351	31.7759	38.6077	58.0726	54.564	61.5214	26.1261	23.0682	29.3664	40.1752	36.7549	43.6683
12oct [w42]	36.5258	33.6277	39.4987	56.04	53.0499	58.9977	25.6338	23.0349	28.368	39.782	36.8761	42.7427
19oct [w43]	34.188	31.47	36.9859	55.6951	52.8245	58.5376	24.0171	21.5944	26.5711	38.526	35.7549	41.3537
26oct [w44]	38.552	35.6708	41.4944	58.0125	55.0555	60.9272	27.7828	25.1586	30.5259	41.0027	38.1005	43.9523
02nov [w45]	37.9906	35.3164	40.7203	57.1318	54.3787	59.8523	26.7661	24.3516	29.2883	42.1705	39.4574	44.9194
09nov [w46]	37.1732	34.4586	39.9496	56.1489	53.3302	58.9382	26.8791	24.4126	29.4572	40.2104	37.4624	43.005
16nov [w47]	40.7323	38.0578	43.4484	56.217	53.4987	58.9077	30.8924	28.3983	33.4725	41.0701	38.4077	43.7721
23nov [w48]	36.4837	33.4694	39.5792	54.3895	51.2289	57.524	24.8984	22.2241	27.7237	36.4278	33.4254	39.5112
30nov [w49]	28.967	26.0822	31.9844	45.9205	42.726	49.1402	19.7018	17.2028	22.3925	31.0669	28.1433	34.1078
07dec [w50]	29.3959	26.7271	32.1744	44.8214	41.8812	47.789	19.6573	17.3563	22.1206	29.7321	27.0668	32.5044
14dec [w51]	39.7506	37.0599	42.4884	54.2768	51.5081	57.026	29.3063	26.8265	31.8813	38.7247	36.0519	41.4493
21dec [w52]	46.4385	43.4324	49.4641	57.3013	54.2913	60.2715	36.6327	33.7541	39.5844	45.6562	42.6573	48.6788
28dec [w53]	44.9812	42.7048	47.2734	55.5437	53.2556	57.8143	34.9973	32.8297	37.2123	42.4746	40.2189	44.7539
04jan [w1]	47.9843	45.7928	50.1816	57.9696	55.7924	60.1239	38.4464	36.3257	40.6005	44.8749	42.7003	47.0644
11jan [w2]	38.5043	36.3535	40.6892	51.1358	48.909	53.3592	29.1561	27.1606	31.2136	37.2539	35.1198	39.4258
18jan [w3]	34.4617	32.2665	36.7076	48.5083	46.1822	50.8392	25.4717	23.4735	27.55	35.1934	32.9911	37.4437
25jan [w4]	31.3169	29.04	33.6633	47.8589	45.3764	50.3494	23.3144	21.2535	25.4745	34.3199	31.9841	36.7139
01feb [w5]	32.0061	29.4807	34.6128	48.3945	45.6542	51.142	23.2772	21.0092	25.6661	34.633	32.0533	37.2821
08feb [w6]	31.8668	28.7264	35.1349	48.6358	45.2124	52.0689	21.8787	19.1277	24.8284	34.7568	31.541	38.0796
15feb [w7]	34.6334	30.9501	38.459	49.766	45.8261	53.7081	25.273	21.9512	28.8244	35.8814	32.1626	39.7309
22feb [w8]	32.4257	27.8809	37.2304	44.6914	39.7802	49.6807	22.7723	18.7716	27.177	31.1111	26.6314	35.8695
01mar [w9]	32.9341	27.9154	38.2588	45.2096	39.7857	50.7192	22.7545	18.3677	27.6318	29.3413	24.5109	34.5425
08mar [w10]	30.0429	24.2299	36.372	40.7725	34.4018	47.3812	25.3219	19.8701	31.4133	31.7597	25.8342	38.1565

## Sheet: Figure 3D
wofy	high_p	high_l	high_u	mod_p	mod_l	mod_u	low_p	low_l	low_u
27apr [w18]	54.5455	38.8472	69.6093	27.2727	14.9577	42.7896	18.1818	8.19188	32.7137
11may [w20]	77.7778	64.4001	87.9564	16.6667	7.91544	29.2941	5.55556	1.16068	15.3885
25may [w22]	95.8333	78.8798	99.8946	4.16667	0.105435	21.1202	0	0	14.2474
09jun [w24]	78.2609	56.2969	92.5397	8.69565	1.071	28.0379	13.0435	2.77515	33.5889
24jun [w26]	53.8462	25.1345	80.7768	46.1538	19.2232	74.8654	0	0	24.7053
07jul [w28]	42.1053	20.2521	66.5002	21.0526	6.05245	45.5653	36.8421	16.2886	61.6422
20jul [w30]	24.1379	10.2984	43.54	31.0345	15.2846	50.8323	44.8276	26.4455	64.3061
03aug [w32]	66.6667	46.0393	83.4812	18.5185	6.3	38.083	14.8148	4.18874	33.7311
17aug [w34]	64.4444	48.7801	78.1316	20	9.57573	34.5958	15.5556	6.49092	29.4552
31aug [w36]	87.5	73.1967	95.814	7.5	1.57422	20.3865	5	0.611365	16.9197
07sep [w37]	85.2273	76.0638	91.893	11.3636	5.5858	19.9068	3.40909	0.708631	9.64096
14sep [w38]	83.8926	76.9881	89.3987	13.4228	8.39573	19.9667	2.68456	0.736194	6.73072
21sep [w39]	83.0579	77.7261	87.5592	13.2231	9.22348	18.1516	3.71901	1.71443	6.94221
28sep [w40]	87.0476	83.8705	89.7998	9.90476	7.48606	12.7856	3.04762	1.75181	4.90205
05oct [w41]	81.2265	78.3429	83.8775	13.8924	11.5683	16.4864	4.8811	3.49363	6.61251
12oct [w42]	84.3155	82.033	86.4132	12.33	10.4469	14.4166	3.35449	2.37265	4.59426
19oct [w43]	80.6695	78.3143	82.8726	13.6402	11.7437	15.7175	5.69038	4.44555	7.15847
26oct [w44]	86.034	83.8616	88.0146	10.8326	9.07025	12.8041	3.13339	2.19203	4.33102
02nov [w45]	83.7335	81.6053	85.7069	12.7808	11.0071	14.7258	3.48567	2.55361	4.6365
09nov [w46]	79.1936	76.8259	81.4219	14.7581	12.829	16.8559	6.04839	4.78681	7.52301
16nov [w47]	82.3662	80.2071	84.381	13.4891	11.6958	15.4457	4.14469	3.13734	5.36096
23nov [w48]	76.2866	73.5122	78.9038	18.0626	15.7146	20.6019	5.65086	4.29648	7.27569
30nov [w49]	71.4734	68.4972	74.3167	19.1223	16.6765	21.7596	9.40439	7.63001	11.433
07dec [w50]	73.2143	70.5174	75.7887	17.0536	14.8951	19.3866	9.73214	8.05922	11.6199
14dec [w51]	85.6921	83.6579	87.5614	12.8305	11.0504	14.7824	1.47745	0.891803	2.29764
21dec [w52]	87.061	84.9138	89.0042	10.1664	8.42971	12.123	2.77264	1.87834	3.9346
28dec [w53]	80.557	78.6876	82.3299	14.3546	12.7943	16.0278	5.08838	4.13601	6.18476
04jan [w1]	82.8347	81.1266	84.4478	14.1736	12.6875	15.7635	2.99166	2.29595	3.82649
11jan [w2]	70.9238	68.8689	72.9166	20.0909	18.3465	21.9242	8.98536	7.76223	10.3314
18jan [w3]	66.6851	64.4603	68.8556	22.3757	20.4741	24.3672	10.9392	9.53783	12.4686
25jan [w4]	64.8615	62.4561	67.2117	23.8035	21.7274	25.977	11.335	9.81687	12.9977
01feb [w5]	61.9266	59.2325	64.567	28.1346	25.7109	30.6569	9.93884	8.37067	11.6896
08feb [w6]	65.0059	61.6789	68.2276	24.5552	21.6835	27.6059	10.4389	8.45673	12.7024
15feb [w7]	66.7707	62.9753	70.4107	24.649	21.3579	28.1755	8.58034	6.52915	11.0221
22feb [w8]	68.8889	64.1305	73.3686	22.2222	18.2656	26.5902	8.88889	6.30334	12.0935
01mar [w9]	65.8683	60.51	70.9422	24.2515	19.7515	29.2146	9.88024	6.89911	13.5953
08mar [w10]	75.5365	69.497	80.9137	16.7382	12.1814	22.1635	7.72532	4.64262	11.9346

## Sheet: Figure 4A
wofy	median_high	median_mod	median_low
27apr [w18]	27.8006	32.2752	35.1419
11may [w20]	26.1966	31.7778	34.9516
25may [w22]	28.8253	32.5619
09jun [w24]	28.5242	32.0172	34.7982
24jun [w26]	30.867	32.5259
07jul [w28]	32.346	34.3728	35.1134
20jul [w30]	31.8642	33.7175	34.8936
03aug [w32]	24.8969	34.8484	35.4021
17aug [w34]	28.6522	33.8687	34.9751
31aug [w36]	21.5033	33.1082	34.67
07sep [w37]	21.8938	32.6323	34.5408
14sep [w38]	25.5661	32.4758	34.9268
21sep [w39]	24.9411	32.6644	34.8899
28sep [w40]	22.9019	32.8949	34.6497
05oct [w41]	23.7294	33.008	35.051
12oct [w42]	25.5325	33.1571	35.2822
19oct [w43]	24.8873	32.9743	34.8135
26oct [w44]	25.1	33.0409	34.9087
02nov [w45]	26.7748	33.2154	34.8384
09nov [w46]	25.763	33.3176	34.843
16nov [w47]	28.0339	33.3535	34.9348
23nov [w48]	28.4089	33.3744	34.92
30nov [w49]	27.9308	33.5207	34.7637
07dec [w50]	25.9409	33.5381	34.7035
14dec [w51]	22.459	33.4218	34.7645
21dec [w52]	22.4782	33.2073	35.0154
28dec [w53]	24.1674	33.5512	34.4954
04jan [w1]	25.5269	32.9604	34.6148
11jan [w2]	27.6777	33.4744	34.8099
18jan [w3]	28.6378	33.4485	34.8181
25jan [w4]	29.1278	33.5385	34.8729
01feb [w5]	29.071	33.4552	34.7103
08feb [w6]	29.0008	33.4445	34.6134
15feb [w7]	28.6171	33.4632	34.75
22feb [w8]	28.1374	33.2034	34.6687
01mar [w9]	28.5401	33.5489	34.5799
08mar [w10]	27.8874	33.2806	34.4966

## Sheet: Figure 4B
wofy	high_p	high_l	high_u	mod_p	mod_l	mod_u	low_p	low_l	low_u
27apr [w18]	0.151735	0.110272	0.203644	0.0655218	0.0394528	0.102302	0.0379337	0.0189378	0.0678636
18may [w21]	0.0832578	0.0607351	0.11139	0.00555052	0.00114467	0.0162201	0.000511102	0.000511102	0.00682483
09jun [w24]	0.0380559	0.0235587	0.0581666	0.00906093	0.00294212	0.0211439	0.00543656	0.00112116	0.0158871
30jun [w27]	0.0178142	0.00920518	0.0311157	0.0103916	0.00417807	0.0214095	0.0103916	0.00417807	0.0214095
20jul [w30]	0.0166982	0.0086285	0.0291666	0.0153067	0.00764128	0.0273862	0.0222643	0.0127265	0.0361533
10aug [w33]	0.0388597	0.0280081	0.0525235	0.0111028	0.0057371	0.0193935	0.00740186	0.00319565	0.0145841
31aug [w36]	0.0738552	0.0514481	0.1027	0.00633045	0.00130551	0.0184991	0.0042203	0.000511102	0.0152443
07sep [w37]	0.130712	0.102827	0.163822	0.0174283	0.00835785	0.0320489	0.00522848	0.00107825	0.0152791
14sep [w38]	0.184641	0.153716	0.219952	0.0295425	0.0180463	0.0456224	0.00590851	0.00160989	0.0151274
21sep [w39]	0.220986	0.191517	0.253698	0.0351818	0.0240656	0.0496627	0.00989489	0.00452467	0.0187828
28sep [w40]	0.395986	0.360571	0.433929	0.0450575	0.0336529	0.0590828	0.0138639	0.00792459	0.0225131
05oct [w41]	0.504905	0.466889	0.545179	0.0863551	0.0710446	0.103985	0.030341	0.0215763	0.0414748
12oct [w42]	0.646345	0.605589	0.689109	0.0945193	0.0793077	0.111796	0.0257148	0.0181062	0.0354427
19oct [w43]	0.786233	0.737555	0.837259	0.132942	0.113327	0.154973	0.0554604	0.0430697	0.0703041
26oct [w44]	0.923834	0.866586	0.983843	0.11632	0.0965287	0.138972	0.0336464	0.023437	0.0467909
02nov [w45]	0.936555	0.881789	0.993807	0.142952	0.121984	0.166486	0.038987	0.0284388	0.0521643
09nov [w46]	0.867192	0.814009	0.922914	0.161605	0.139053	0.186768	0.0662316	0.0520988	0.0830149
16nov [w47]	0.871625	0.820917	0.924624	0.142745	0.122611	0.165239	0.0438603	0.0330433	0.0570865
23nov [w48]	0.61083	0.568178	0.655821	0.144628	0.124228	0.167418	0.0452467	0.0341806	0.0587526
30nov [w49]	0.626758	0.580793	0.675376	0.167685	0.144286	0.193794	0.0824682	0.0663192	0.101358
07dec [w50]	0.777141	0.725039	0.831975	0.181017	0.156273	0.20856	0.103303	0.0848298	0.124601
14dec [w51]	0.953032	0.897832	1.01071	0.162586	0.14019	0.187538	0.0164316	0.00989316	0.0256588
21dec [w52]	1.52593	1.4307	1.62575	0.178187	0.14647	0.214724	0.0485964	0.0327901	0.0693671
28dec [w53]	1.60478	1.5253	1.68728	0.285958	0.252784	0.322266	0.101366	0.0820185	0.1239
04jan [w1]	1.49664	1.4266	1.56918	0.256085	0.22744	0.287332	0.0540526	0.0413484	0.0694275
11jan [w2]	1.28408	1.2182	1.35255	0.363746	0.328939	0.401223	0.16268	0.139674	0.188389
18jan [w3]	1.08084	1.02102	1.14322	0.362669	0.328259	0.399695	0.177305	0.153485	0.203769
25jan [w4]	0.907145	0.852814	0.964006	0.332914	0.300242	0.368161	0.15853	0.136231	0.183434
01feb [w5]	0.69293	0.646175	0.742155	0.314812	0.283509	0.348619	0.111211	0.0929245	0.13204
08feb [w6]	0.472479	0.433826	0.51364	0.178473	0.155004	0.204486	0.0758725	0.0608563	0.0934689
15feb [w7]	0.383616	0.348189	0.421658	0.141615	0.120407	0.165479	0.0492964	0.0371389	0.0641613
22feb [w8]	0.266265	0.235969	0.299363	0.0858918	0.0690726	0.105565	0.0343567	0.0240641	0.047561
01mar [w9]	0.216785	0.189109	0.247365	0.0798163	0.0633906	0.0991948	0.0325178	0.0223848	0.045664
08mar [w10]	0.202355	0.173587	0.234521	0.04484	0.0318875	0.0612927	0.0206954	0.0122658	0.0327056

## Sheet: Figure 5
postonly	DAY	perc
Antibody result(s) before 1st swab-positive (day 0)	[-120,-91]	3.19829
Antibody result(s) before 1st swab-positive (day 0)	[-90,-61]	3.82979
Antibody result(s) before 1st swab-positive (day 0)	[-60,-31]	5.36278
Antibody result(s) before 1st swab-positive (day 0)	[-30,-1]	12.0792
Antibody result(s) before 1st swab-positive (day 0)	[0,13]	40.3685
Antibody result(s) before 1st swab-positive (day 0)	[14,29]	68.4887
Antibody result(s) before 1st swab-positive (day 0)	[30,59]	71.6108
Antibody result(s) before 1st swab-positive (day 0)	[60,89]	76.5668
Antibody result(s) before 1st swab-positive (day 0)	[90,119]	79.602
Antibody result(s) before 1st swab-positive (day 0)	[120,150]	80
No antibody result(s) before 1st swab-positive (day 0)	[0,13]	55.2326
No antibody result(s) before 1st swab-positive (day 0)	[14,29]	74.4141
No antibody result(s) before 1st swab-positive (day 0)	[30,59]	78.3771
No antibody result(s) before 1st swab-positive (day 0)	[60,89]	77.4826
No antibody result(s) before 1st swab-positive (day 0)	[90,119]	78.903
No antibody result(s) before 1st swab-positive (day 0)	[120,150]	80.6938
